# Supplementary material for: Spatial Transferability of Random Forest Models for Crop Type Classification Using Sentinel-1 and Sentinel-2
Source: MDPI journal article supplement (doi:10.3390/rs14061493), 2022-03-20
Supplement: s1 [file s1]

**Supplementary Materials** for:

# **Spatial Transferability of Random Forest Models for Crop Type Classification using Sentinel-1 and Sentinel-2**

**Aiym Orynbaikyzy<sup>1,2\*</sup>, Ursula Gessner<sup>1</sup>, and Christopher Conrad<sup>2</sup>**

<sup>1</sup> German Remote Sensing Data Center (DFD), German Aerospace Center (DLR), Muenchner Strasse 20, 82234 Wessling, Germany; [ursula.gessner@dlr.de](mailto:ursula.gessner@dlr.de)

<sup>2</sup> Department of Geocology, Institute of Geosciences and Geography, Martin-Luther-University of Halle-Wittenberg, Von-Seckendorff-Platz 4, 06120 Halle, Germany; [christopher.conrad@geo.uni-halle.de](mailto:christopher.conrad@geo.uni-halle.de)

\* Correspondence: [aiym.orynbaikyzy@dlr.de](mailto:aiym.orynbaikyzy@dlr.de)

## Supplementary Material A

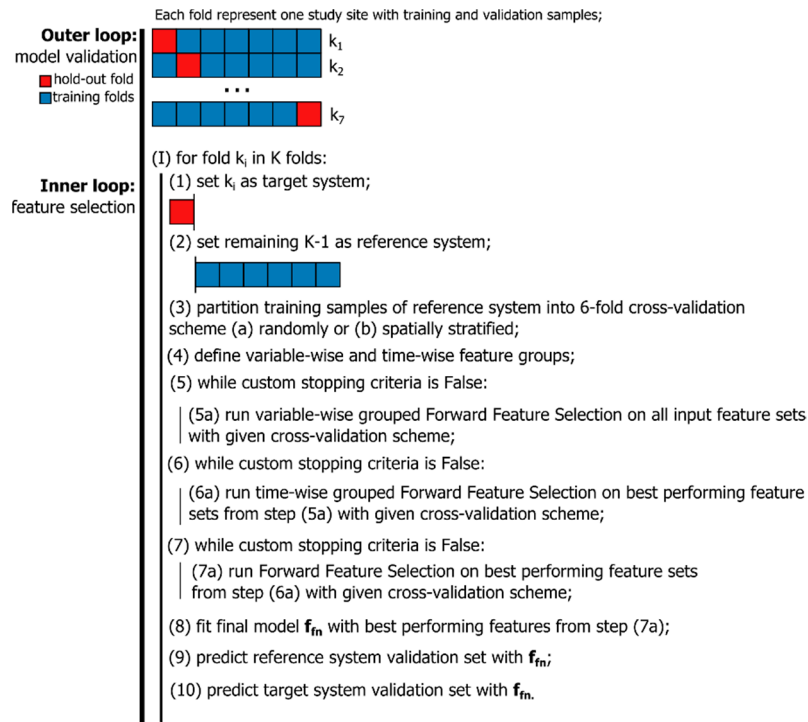

**Figure. S1** Nested cross-validation strategy for model validation and feature selection.

## Supplementary Material B

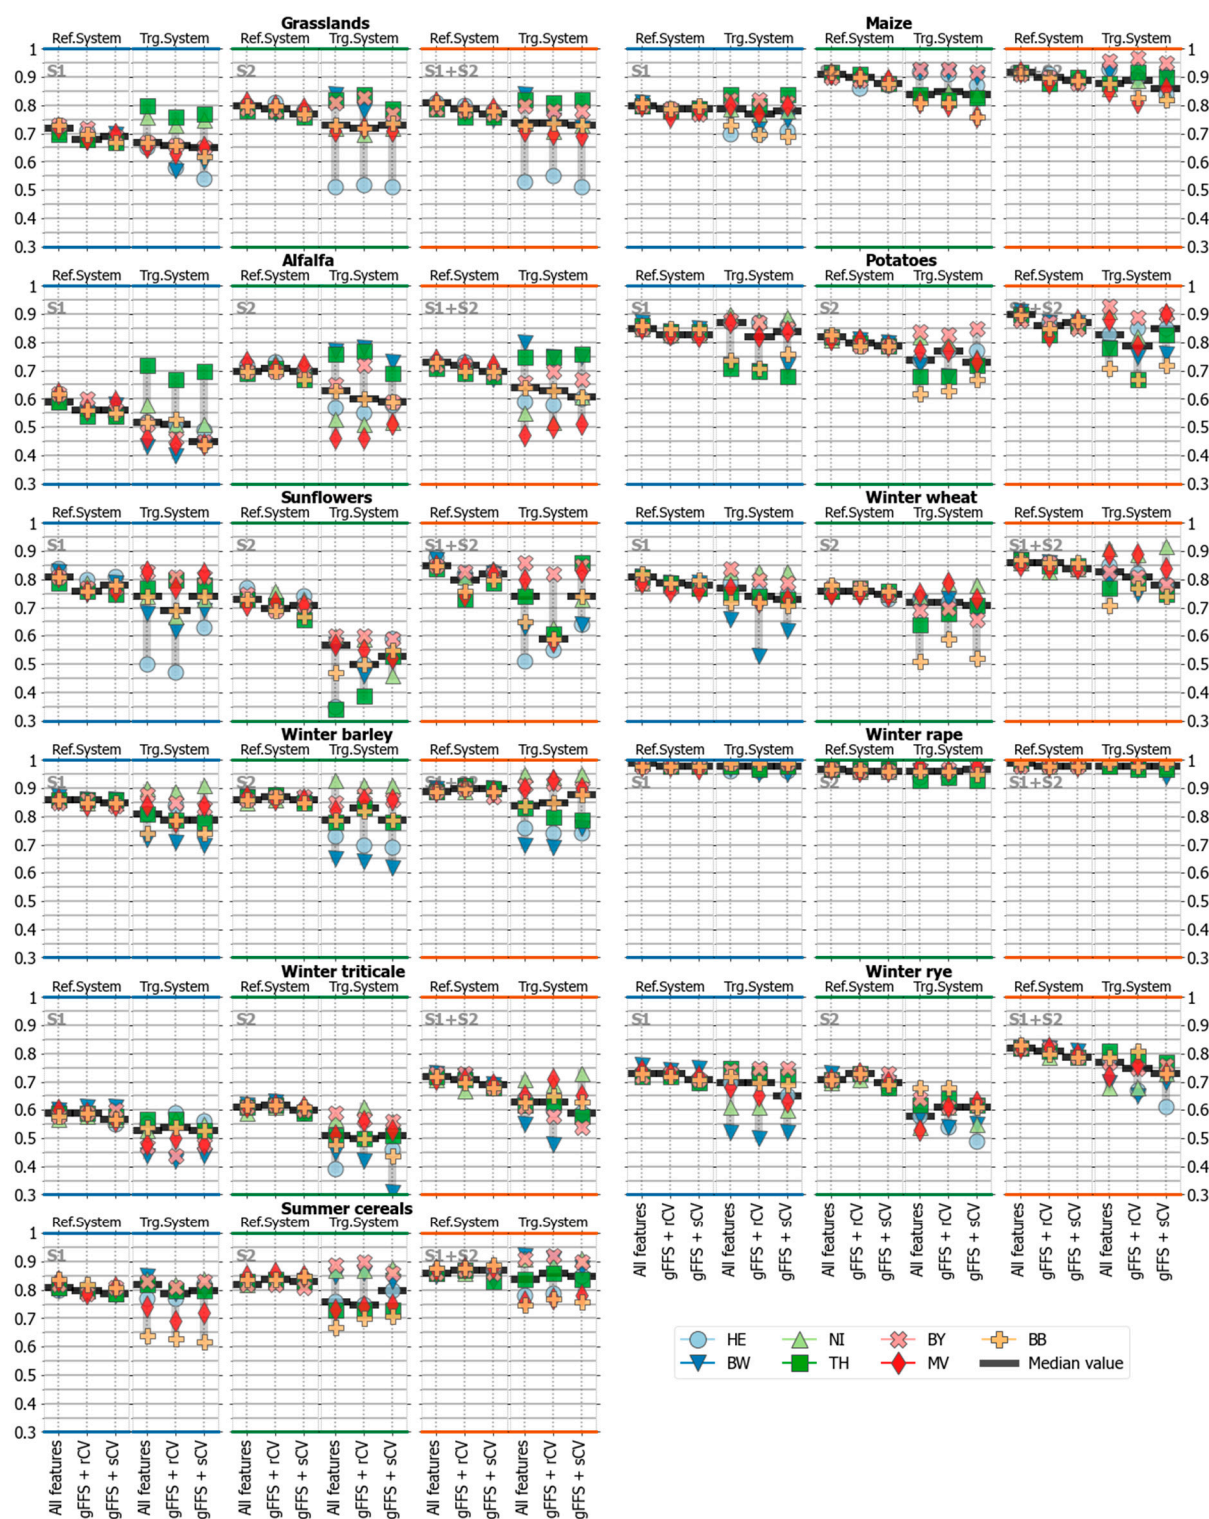

**Figure. S2** Crop-specific classification accuracies (F1-score) in reference and target systems based on three sensor groups and three model building approaches. The abbreviation keys are provided in Table 2 of the main manuscript document.

## Supplementary Material C

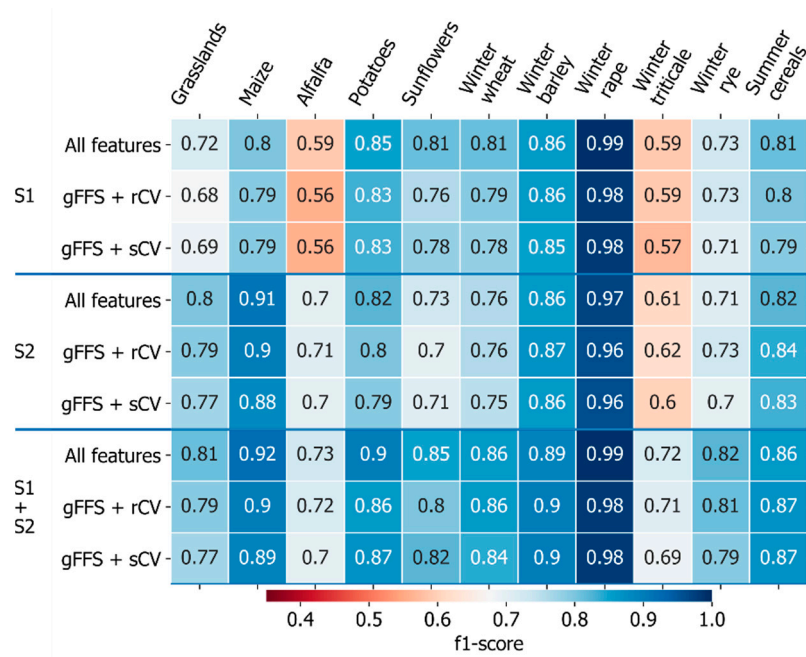

**Figure. S3** Median values of class-specific accuracies for a given experiment in the reference system.

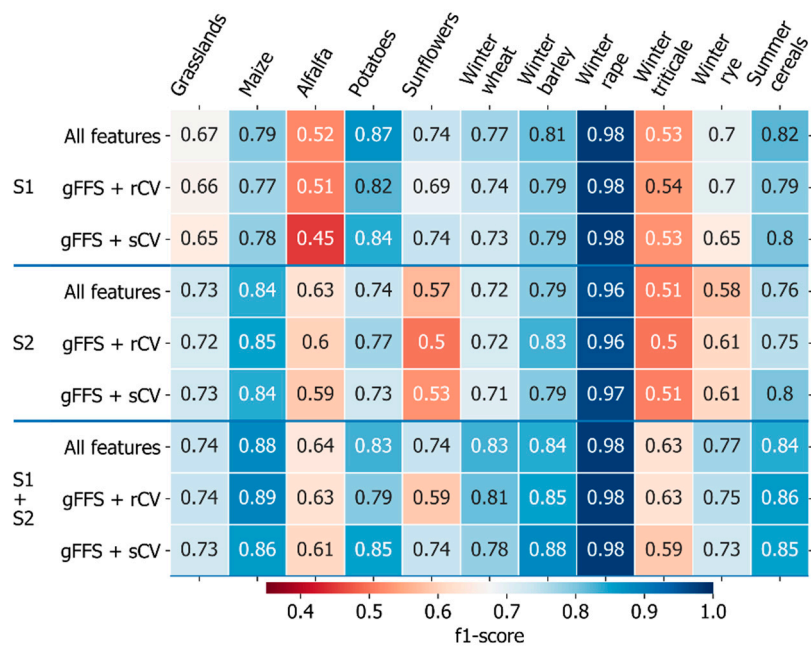

**Figure. S4** Median values of class-specific accuracies for a given experiment in the target system.

## Supplementary Material D

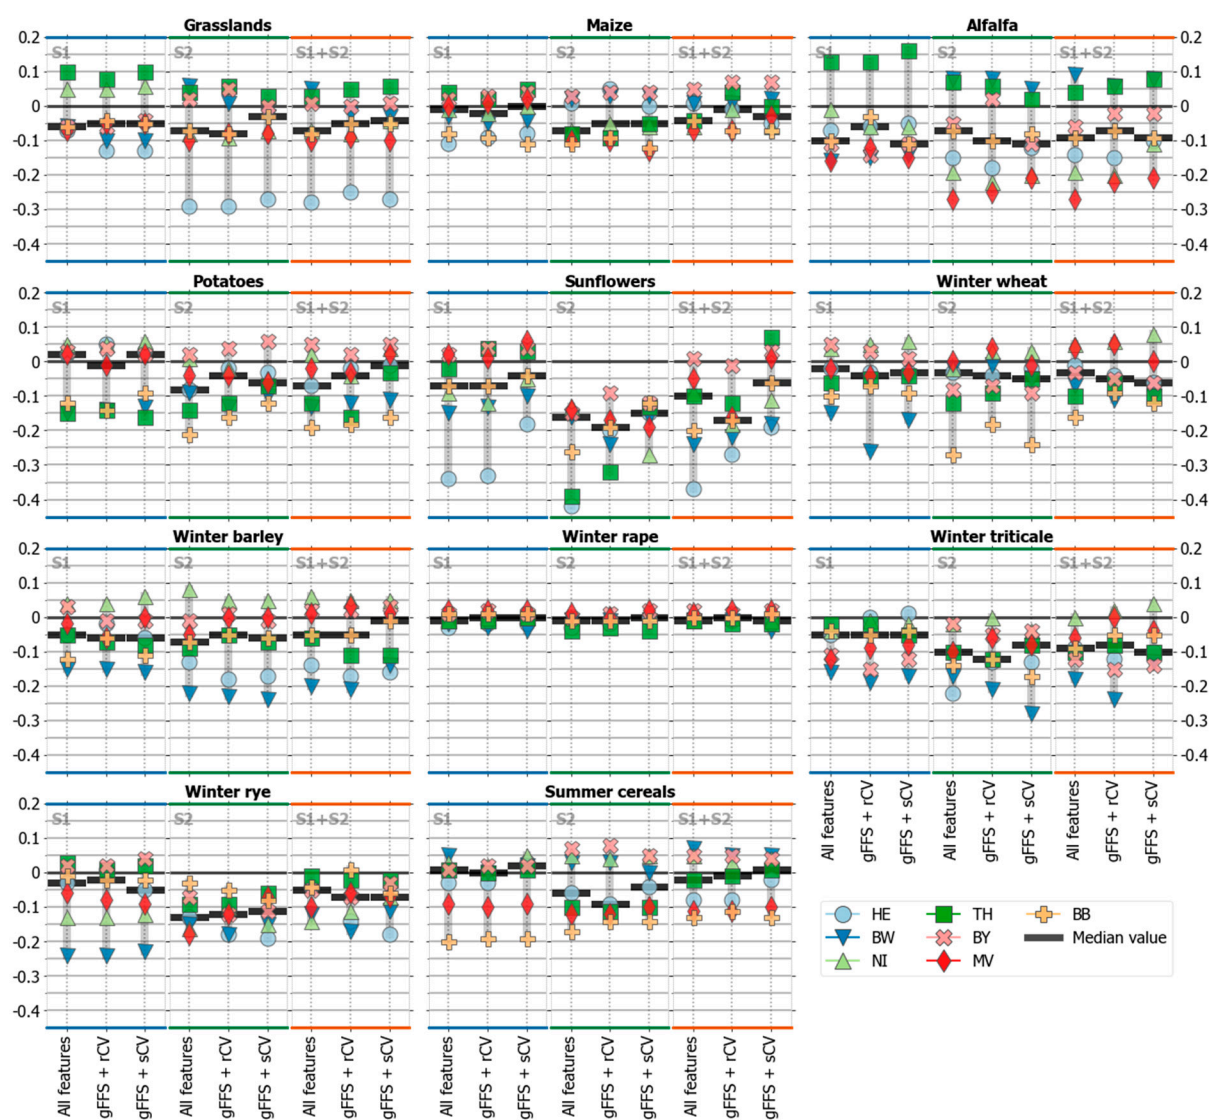

**Figure. S5** Crop-specific accuracy losses in the target system. The abbreviation keys are provided in Table 2 of the main manuscript document.



## Supplementary Material E

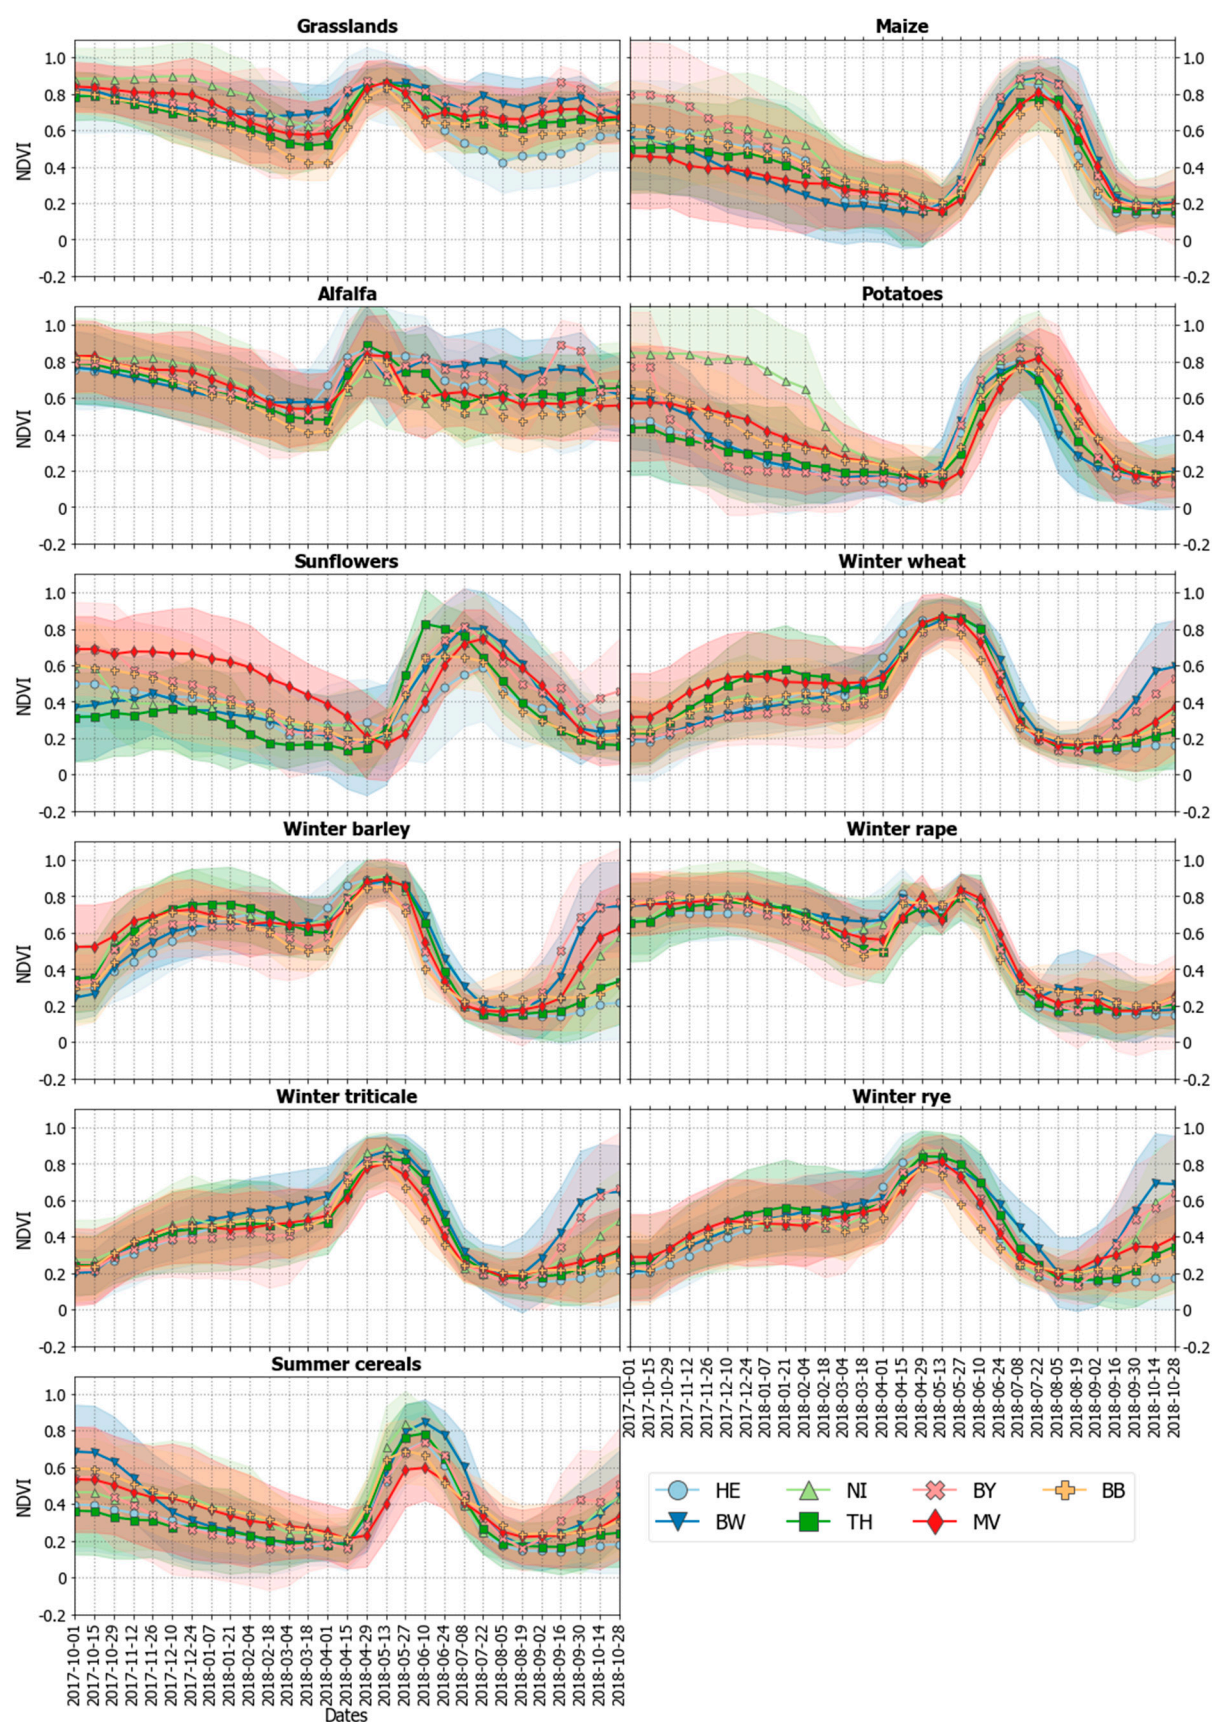

Figure. S6 NDVI temporal profiles based on all sample points for seven study sites.



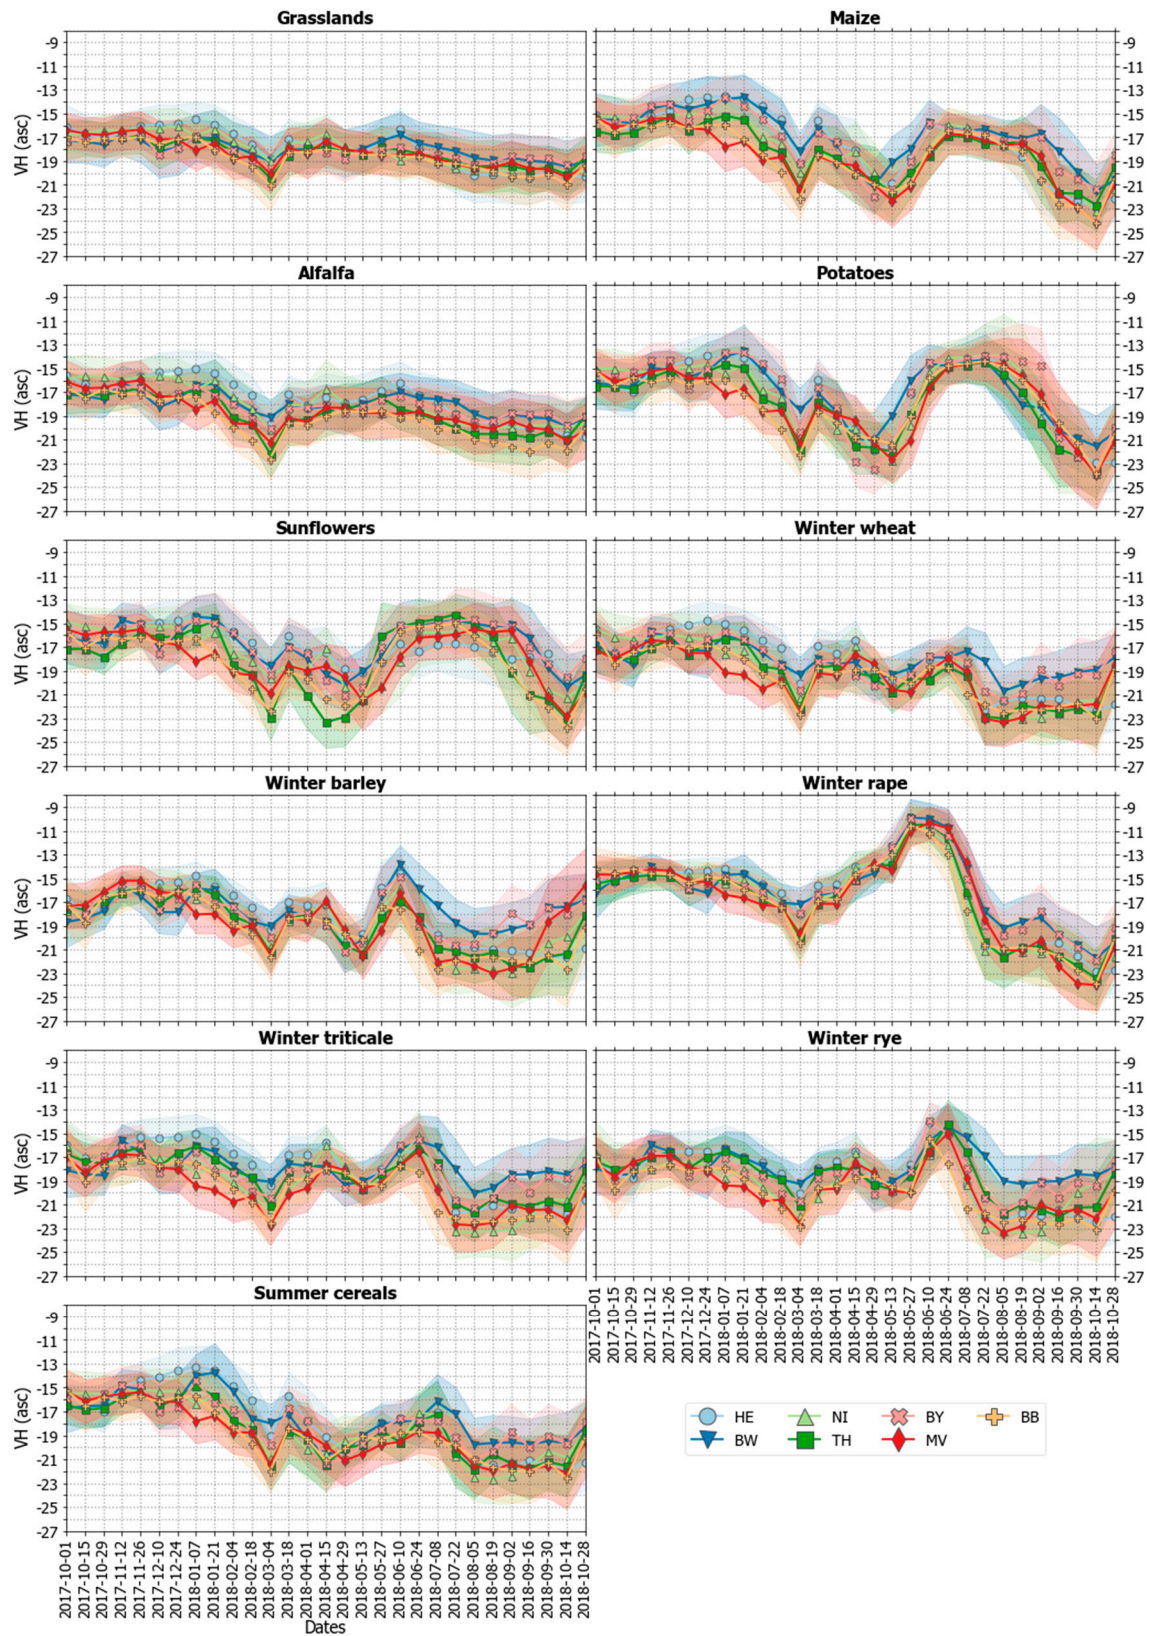

**Figure. S7** VH temporal profiles based on all sample points for seven study sites.

## Supplementary Material F

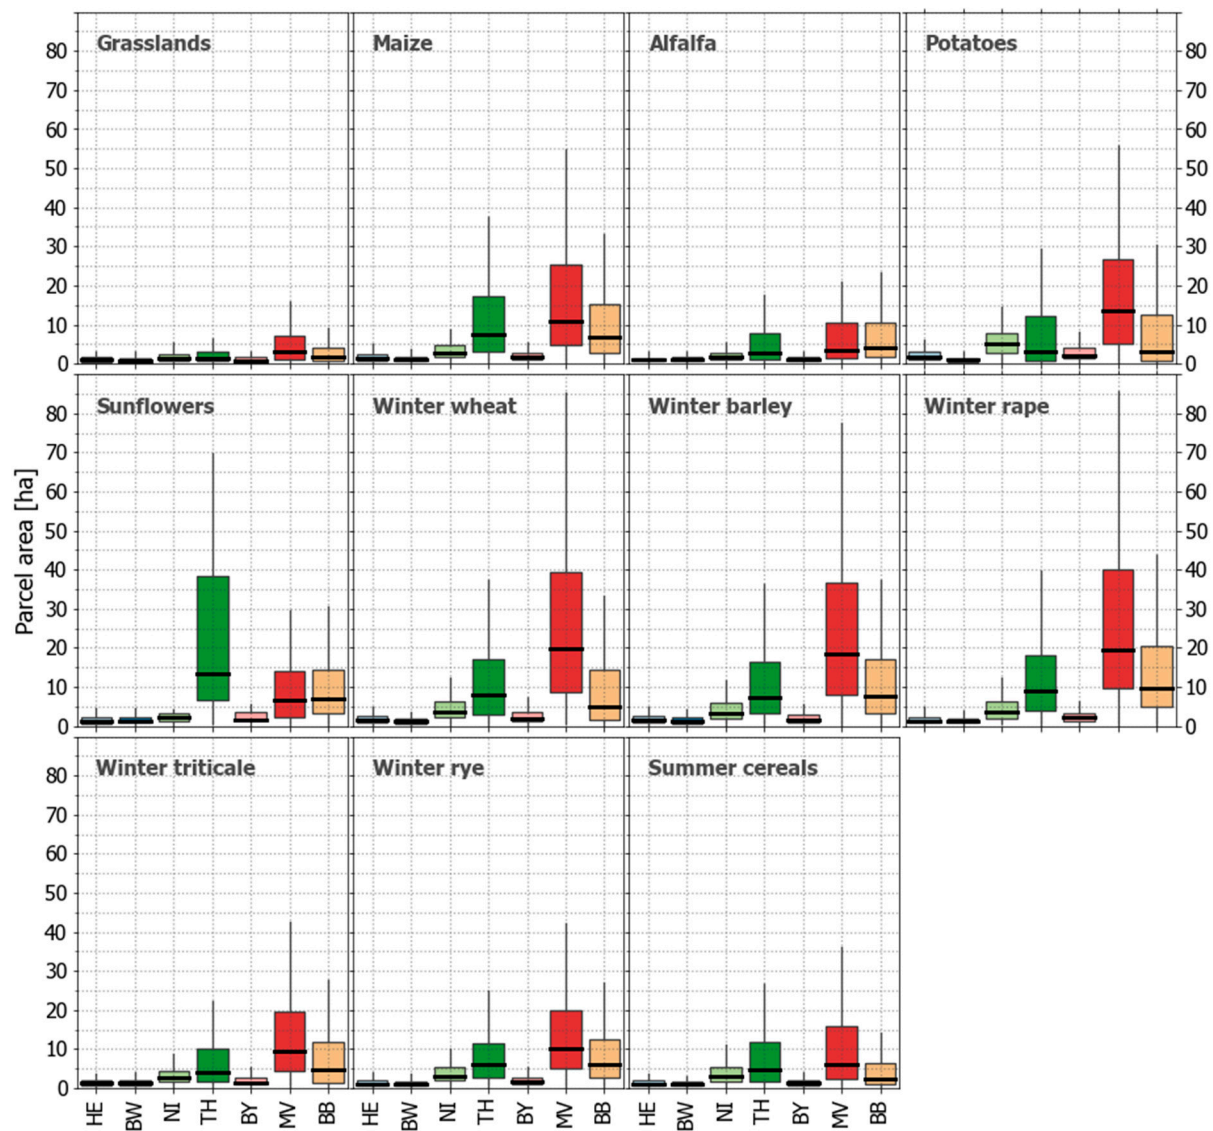

**Figure. S8** Parcel size distributions across seven study sites for all crop types.



## Supplementary Material G

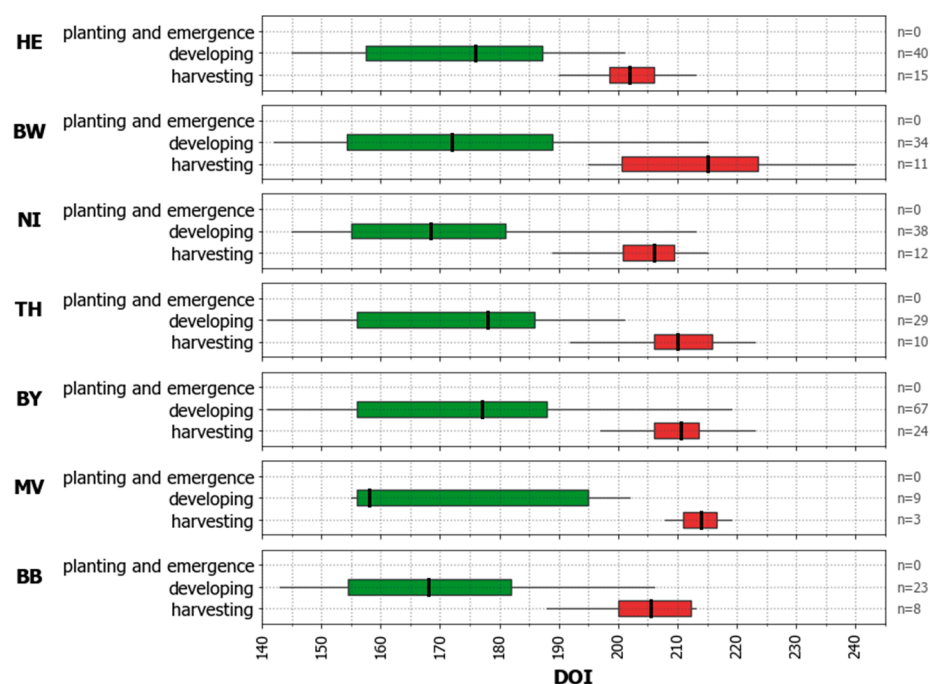

**Figure. S9** Phenological phase observations for summer oat (part of summer cereals class) located within the seven study sites (data source: DWD, 2018d). The following grouping of recorded phenological phases was applied: '*Developing*' includes 'beginning of mil ripeness', 'yellow ripeness', 'beginning tassel emergence', 'beginning of shooting'; '*Harvesting*' includes 'harvest'. No observation was found for the 'Planting and emergence' stage.

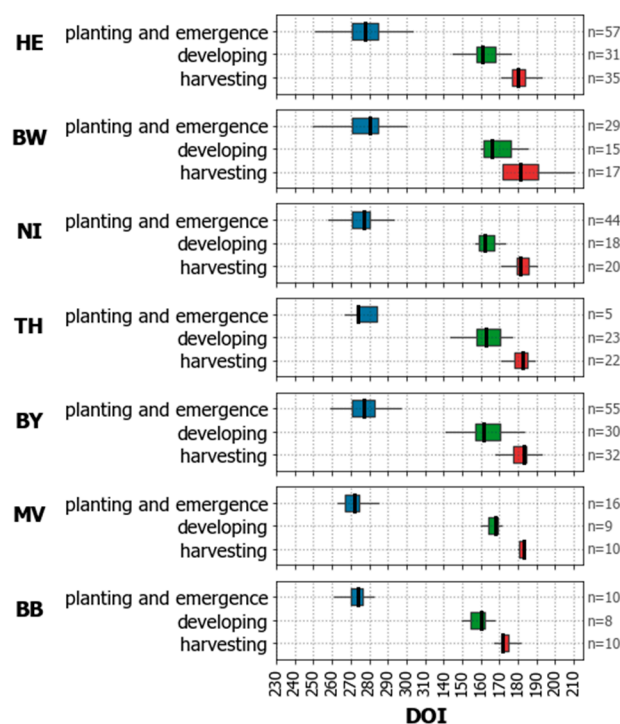

**Figure. S10** Phenological phase observations for winter barley located within the seven study sites (data source: DWD, 2018d). The following grouping of recorded phenological phases was applied: '*Planting and emergence*' include 'beginning of tilling sowing drilling' and 'beginning of emergence'; '*Developing*' includes 'yellow ripeness', 'beginning of heading'; '*Harvesting*' includes 'harvest'.

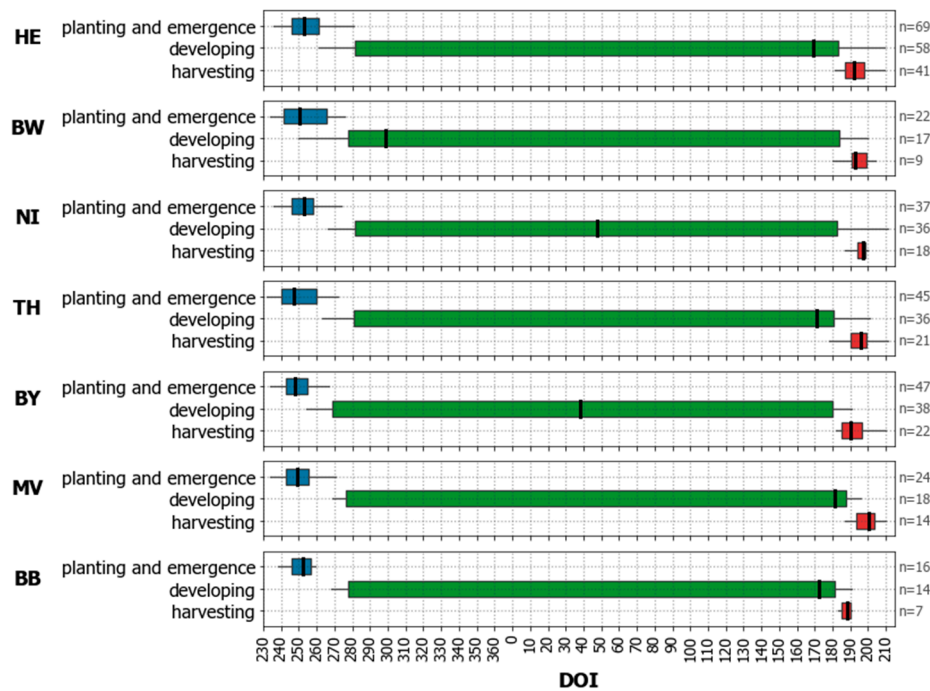

**Figure. S11** Phenological phase observations for winter rape located within the seven study sites (data source: DWD, 2018d). The following grouping of recorded phenological phases was applied: '*Planting and emergence*' include 'beginning of tilling sowing drilling' and 'beginning of emergence'; '*Developing*' includes 'beginning of rosette formation', 'beginning of full ripeness'; '*Harvesting*' includes 'harvest'.

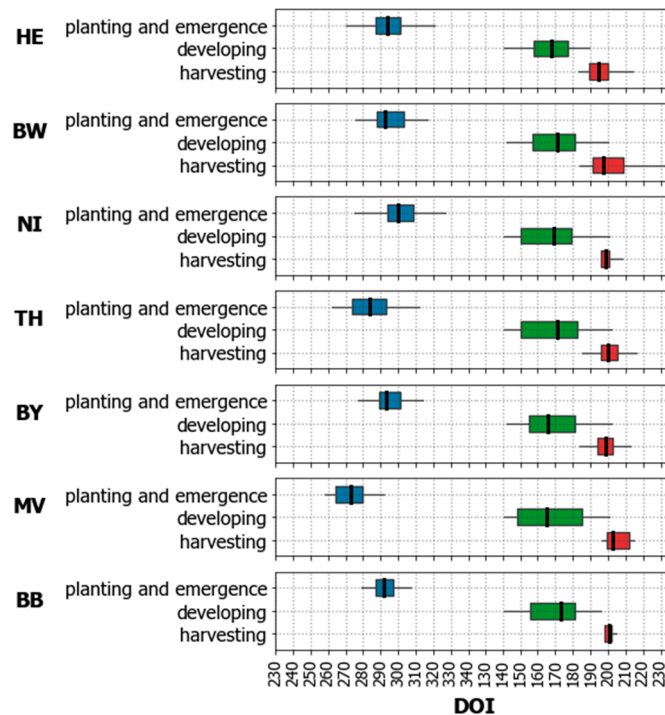

**Figure. S12** Phenological phase observations for winter wheat located within the seven study sites (data source: DWD, 2018d). The following grouping of recorded phenological phases was applied: '*Planting and emergence*' include 'beginning of tilling sowing drilling' and 'beginning of emergence'; '*Developing*' includes 'beginning of mil ripeness', 'yellow ripeness', 'beginning of heading', 'beginning of shooting'; '*Harvesting*' includes 'harvest'.

## **References**

DWD, 2018. Climate Data Center (CDC): Phenological observations of crops from sowing to harvest (annual reporters, recent), Available online:  
[https://opendata.dwd.de/climate\\_environment/CDC/observations\\_germany/phenology/annual\\_reporters/crops/recent](https://opendata.dwd.de/climate_environment/CDC/observations_germany/phenology/annual_reporters/crops/recent). Version v006. Last accessed: 26.05.2021 [WWW Document].
