# Supplementary material for: Spatial Transferability of Random Forest Models for Crop Type Classification Using Sentinel-1 and Sentinel-2
Source: MDPI journal article supplement (doi:10.3390/rs14061493), 2022-03-20
Supplement: s1 [file s1]

Archive with 1 entries (1 files):
- remotesensing-1523760-supplementary.pdf
